# Supplementary material
Source: PubMed Central journal article supplement (PMC4495191)
Supplement: AEM.00935-15_zam999116417so1.pdf [file AEM.00935-15_zam999116417so1.pdf]

## Supporting information

### **Diversity of sediment microbial community in response to acid mine drainage pollution gradients in the Aha watershed (Southwest China)**

Weimin Sun<sup>a,b</sup>, Tangfu Xiao<sup>a,\*</sup>, Min Sun<sup>a</sup>, Yiran Dong<sup>c</sup>, Zengping Ning<sup>a</sup>, Enzong Xiao<sup>a</sup>, Song Tang<sup>d</sup>, Jiwei Li<sup>e</sup>.

<sup>a</sup> State Key Laboratory of Environmental Geochemistry, Institute of Geochemistry, Chinese Academy of Sciences, Guiyang 50081, China

<sup>b</sup> Department of Microbiology and Biochemistry, Rutgers University, New Brunswick, NJ 08901, USA

<sup>c</sup> Department of Geology, University of Illinois-Urbana Champaign, Urbana, IL, 61801, USA

<sup>d</sup> School of Environment and Sustainability, University of Saskatchewan, Saskatoon, SK S7N 5B3, Canada

<sup>e</sup> Sanya Institute of Deep-Sea Science and Engineering, Chinese Academy of Sciences, Sanya, 572000, China.

\*Corresponding author. Mailing address: 99 Lincheng Road West, Guiyang, Guizhou Province, P. R. China 550002. Phone: +86-851-

85895318. Fax: +86-851-85891334. Email: xiaotangfu@vip.gyig.ac.cn

**Table S1.** Major elemental concentrations in the AMD sediment samples from AHA watershed.

| Sample ID | SiO <sub>2</sub> | Al <sub>2</sub> O <sub>3</sub> | Fe <sub>2</sub> O <sub>3</sub> | MgO  | CaO    | Na <sub>2</sub> O | K <sub>2</sub> O | MnO    | P <sub>2</sub> O <sub>5</sub> | TiO <sub>2</sub> | LOI   | TOTAL  |
|-----------|------------------|--------------------------------|--------------------------------|------|--------|-------------------|------------------|--------|-------------------------------|------------------|-------|--------|
|           | (%)              | (%)                            | (%)                            | (%)  | (%)    | (%)               | (%)              | (%)    | (%)                           | (%)              | (%)   | (%)    |
| SD1       | 24.7             | 6.72                           | 8.34                           | 0.61 | 28.071 | 0.221             | 0.727            | 0.3048 | 0.1655                        | 0.921            | 29.9  | 100.68 |
| SD2       | 22.72            | 6.53                           | 43.72                          | 0.59 | 2.129  | 0.131             | 0.652            | 0.2645 | 0.1802                        | 0.785            | 22.75 | 100.45 |
| SD3       | 40.64            | 11.3                           | 13.29                          | 1.13 | 7.793  | 0.216             | 1.149            | 0.1816 | 0.1765                        | 1.728            | 22.16 | 99.76  |
| SD4       | 38.46            | 10.89                          | 12.58                          | 1.04 | 7.595  | 0.247             | 1.132            | 0.1769 | 0.1664                        | 1.694            | 26.02 | 100    |
| SD5       | 28.36            | 7.97                           | 10.67                          | 1.39 | 22.754 | 0.095             | 0.65             | 0.3679 | 0.1878                        | 0.916            | 26.56 | 99.92  |
| SD6       | 33.5             | 12.78                          | 26.53                          | 0.77 | 1.883  | 0.15              | 0.928            | 0.1957 | 0.2141                        | 1.49             | 21.56 | 100    |
| SD7       | 36.15            | 13.79                          | 22.88                          | 0.85 | 2.074  | 0.141             | 1.082            | 0.1752 | 0.2261                        | 1.621            | 21.19 | 100.18 |
| SD9       | 52.44            | 13.56                          | 7.31                           | 1.64 | 6.749  | 0.092             | 1.699            | 0.7072 | 0.1454                        | 1.238            | 14.81 | 100.39 |
| B1        | 8.52             | 2.93                           | 36.98                          | 0.75 | 0.722  | 0.098             | 0.236            | 0.0642 | 1.3637                        | 0.316            | 48.96 | 100.94 |
| B2        | 1.9              | 0.96                           | 59.5                           | 0.08 | 0.192  | 0.083             | 0.091            | 0.0119 | 0.3444                        | 0.11             | 35.77 | 99.04  |
| SD13      | 46.44            | 11.12                          | 11.79                          | 0.81 | 5.728  | 0.193             | 0.712            | 1.6696 | 0.2127                        | 0.907            | 20.36 | 99.94  |

**Table S2.** OTU number and Chao1, Shannon index in all samples.

| Sample | OTU(3% cutoff) | OTU(5% cutoff) | Chao1(3% cutoff) | Chao1(5% cutoff) | Shannon(3% cutoff) | Shannon(5% cutoff) |
|--------|----------------|----------------|------------------|------------------|--------------------|--------------------|
| B1     | 2951           | 1969           | 8895.576         | 5484.62449       | 9.168469168        | 7.805269494        |
| B2     | 4059           | 2917           | 10922.19372      | 6027.053942      | 10.29290802        | 9.290636306        |
| SD1    | 5197           | 3594           | 16288.33901      | 8169.413043      | 11.34798989        | 10.31164282        |
| SD9    | 4417           | 3143           | 12658.23252      | 7510.315421      | 10.81901508        | 9.943651601        |
| SD2    | 4810           | 3265           | 12621.03982      | 7293.058212      | 11.25947259        | 10.12892784        |
| SD3    | 5402           | 3653           | 16910.19527      | 8756.5625        | 11.50781901        | 10.36412342        |
| SD4    | 5130           | 3485           | 13897.668        | 7731.195167      | 11.32041861        | 10.21053472        |
| SD5    | 5109           | 3476           | 15172.62556      | 8605.514344      | 11.35023272        | 10.2026151         |
| SD6    | 3390           | 2428           | 11054.09391      | 5914.695157      | 9.57772413         | 8.52295451         |
| SD7    | 3535           | 2466           | 10243.87528      | 6129.839623      | 9.754189613        | 8.620459058        |
| SD13   | 5093           | 3463           | 15426.18224      | 8019.055118      | 11.36392189        | 10.25105892        |

**Table S3.** Microbial community composition as shown as relative abundance in the AMD watershed at phylum level.

| Taxonomic group            | B1    | B2    | SD13  | SD1   | SD2   | SD3   | SD4   | SD5   | SD6   | SD7   | SD9   |
|----------------------------|-------|-------|-------|-------|-------|-------|-------|-------|-------|-------|-------|
| Proteobacteria             | 60.7  | 55.73 | 52.79 | 50.44 | 51.33 | 51.81 | 49.28 | 47.22 | 45.25 | 61.85 | 38.09 |
| β-proteobacteria           | 34.52 | 11.52 | 21.17 | 19.48 | 23.46 | 21.64 | 21.93 | 22.02 | 8.82  | 11.16 | 15.30 |
| γ-proteobacteria           | 13.40 | 29.66 | 12.22 | 14.93 | 11.27 | 9.95  | 13.74 | 10.12 | 16.33 | 34.79 | 11.69 |
| δ-proteobacteria           | 6.74  | 5.94  | 9.16  | 7.30  | 7.29  | 11.14 | 6.45  | 9.48  | 9.47  | 7.02  | 6.47  |
| α-proteobacteria           | 4.81  | 6.97  | 5.70  | 7.47  | 8.16  | 7.33  | 5.97  | 4.02  | 9.67  | 7.77  | 3.54  |
| ε-proteobacteria           | 0.25  | 0.52  | 3.67  | 0.22  | 0.32  | 0.71  | 0.32  | 0.51  | 0.19  | 0.27  | 0.35  |
| Actinobacteria             | 5.73  | 5.99  | 2.6   | 3.38  | 3.78  | 3.21  | 3.4   | 2.79  | 5.24  | 6.09  | 7.72  |
| Cyanobacteria              | 3.84  | 5.63  | 1.14  | 1.54  | 1.91  | 0.76  | 0.68  | 0.56  | 1.51  | 5.58  | 0.84  |
| Firmicutes                 | 10.12 | 4.96  | 3.24  | 2.69  | 2.31  | 5.18  | 3.97  | 2.77  | 3.03  | 3.09  | 2.41  |
| Chloroflexi                | 2.27  | 4.37  | 5.41  | 5.2   | 4.79  | 6.33  | 8.58  | 9.91  | 20.13 | 4.58  | 9.59  |
| Acidobacteria              | 3.95  | 4.29  | 4.9   | 6.04  | 4.9   | 5.96  | 8.36  | 5.76  | 9.92  | 3.85  | 6.66  |
| Planctomycetes             | 0.88  | 2.98  | 7.26  | 7.43  | 5.62  | 4.97  | 6.64  | 4.29  | 2.51  | 1.89  | 4.75  |
| Bacteroidetes              | 1     | 2.95  | 7.86  | 6.92  | 11.21 | 5.66  | 3.5   | 6.89  | 1.93  | 2.51  | 3.7   |
| Crenarchaeota<br>(Archaea) | 0.02  | 1.82  | 0.1   | 0.28  | 0.1   | 0.53  | 0.16  | 0.04  | 0.11  | 0.2   | 0.12  |
| Nitrospirae                | 0.61  | 1.67  | 1.46  | 1.22  | 1.53  | 1.73  | 1.7   | 1.53  | 0.92  | 0.99  | 1.69  |
| Gemmatimonadetes           | 0.95  | 1.65  | 1.7   | 1.97  | 2     | 2.28  | 2.85  | 1.63  | 1.49  | 1.57  | 4.96  |
| Verrucomicrobia            | 0.59  | 1.1   | 2.26  | 3.95  | 2.97  | 1.73  | 1.5   | 2.84  | 2.08  | 0.6   | 1.3   |
| WPS-2                      | 2.77  | 0.52  | 0.55  | 0.51  | 0.6   | 0.71  | 0.74  | 0.54  | 0.7   | 0.62  | 0.61  |
| WS3                        | 0.18  | 0.39  | 0.51  | 0.64  | 0.28  | 0.45  | 0.63  | 0.66  | 0.28  | 0.27  | 1.39  |
| Chlorobi                   | 0.31  | 0.28  | 0.87  | 0.53  | 0.86  | 0.85  | 0.66  | 1.82  | 0.46  | 0.62  | 1.26  |
| Armatimonadetes            | 0.06  | 0.17  | 0.19  | 0.17  | 0.11  | 0.13  | 0.2   | 0.15  | 0.1   | 0.37  | 0.06  |
| Spirochaetes               | 0.12  | 0.15  | 0.33  | 0.15  | 0.21  | 0.28  | 0.12  | 0.26  | 0.23  | 0.11  | 0.35  |
| GAL15                      | 0.03  | 0.12  | 0.01  | 0.07  | 0.01  | 0.11  | 0.11  | 0.06  | 0.06  | 0.04  | 3.39  |
| Elusimicrobia              | 0.38  | 0.11  | 0.12  | 0.08  | 0.12  | 0.13  | 0.1   | 0.1   | 0.09  | 0.05  | 0.06  |
| TM6                        | 0.14  | 0.1   | 0.34  | 0.2   | 0.2   | 0.16  | 0.13  | 0.29  | 0.15  | 0.14  | 0.19  |
| GN04                       | 0.03  | 0.09  | 0.17  | 0.1   | 0.11  | 0.21  | 0.07  | 0.21  | 0.06  | 0.02  | 0.17  |
| Chlamydiae                 | 0.07  | 0.08  | 0.31  | 0.12  | 0.35  | 0.16  | 0.15  | 0.14  | 0.07  | 0.17  | 0.1   |

|                            |      |      |      |      |      |      |      |      |      |      |      |
|----------------------------|------|------|------|------|------|------|------|------|------|------|------|
| OP3                        | 0.04 | 0.08 | 0.08 | 0.02 | 0.05 | 0.08 | 0.06 | 0.23 | 0.08 | 0.06 | 0.11 |
| NC10                       | 0.02 | 0.08 | 0.15 | 0.09 | 0.05 | 0.1  | 0.19 | 0.21 | 0.04 | 0.02 | 0.5  |
| WS1                        | 0.02 | 0.06 | 0.05 | 0.01 | 0.03 | 0.06 | 0.05 | 0.11 | 0.04 | 0.08 | 0.13 |
| GOUTA4                     | 0.01 | 0.06 | 0.04 | 0    | 0.02 | 0.04 | 0.02 | 0.03 | 0    | 0.08 | 0.02 |
| OP8                        | 0.04 | 0.05 | 0.08 | 0.07 | 0.04 | 0.07 | 0.12 | 0.34 | 0.06 | 0.09 | 0.12 |
| Euryarchaeota<br>(Archaea) | 0.01 | 0.04 | 0.02 | 0.12 | 0.01 | 0.13 | 0.02 | 0.06 | 0    | 0.08 | 0.03 |
| Rare phyla                 | 0.56 | 0.36 | 0.71 | 0.56 | 0.63 | 0.66 | 0.32 | 1.19 | 0.26 | 0.58 | 0.94 |
| Unclassified               | 4.58 | 4.14 | 4.79 | 5.48 | 3.88 | 5.53 | 5.68 | 7.35 | 3.22 | 3.79 | 8.72 |

\*relative abundances of  $\alpha$ -,  $\beta$ -, $\gamma$ -, $\delta$ -, $\epsilon$ -Proteobacteria were provided. Rare phyla stand for the phyla with relative abundances less than 5%.

Unclassified stands for the reads that cannot be classified with any known phyla.

**Table S4.** Fe and S related bacteria detected in the present study and their relative abundances (%) in the Aha watershed.

| Taxonomic group               | B1     | B2    | SD13  | SD1   | SD2   | SD3   | SD4   | SD5   | SD6   | SD7   | SD9   | Microbial metabolism                                        | Reference                 |
|-------------------------------|--------|-------|-------|-------|-------|-------|-------|-------|-------|-------|-------|-------------------------------------------------------------|---------------------------|
| <i>"Ferrovum myxofaciens"</i> | 13.820 | 2.625 | 2.955 | 2.918 | 3.212 | 2.716 | 2.726 | 2.753 | 1.982 | 2.267 | 1.744 | Acidophilic, autotrophic, Fe-oxidation                      | (Johnson et al., 2014)    |
| <i>Alicyclobacillus</i>       | 6.974  | 1.083 | 0.835 | 0.863 | 0.789 | 1.221 | 1.083 | 0.890 | 1.404 | 0.964 | 0.853 | Acidophilic, autotrophic, Fe- and S-oxidation               | (Jiang et al., 2008)      |
| <i>Thiobacillus</i>           | 0.340  | 0.193 | 0.606 | 0.239 | 0.376 | 0.450 | 0.596 | 0.844 | 0.202 | 0.092 | 0.688 | Halotolerant, acidophilic, autotrophic, Fe- and S-oxidation | (Temple and Colmer, 1951) |
| <i>Acidithiobacillus</i>      | 0.477  | 0.128 | 0.165 | 0.156 | 0.165 | 0.193 | 0.156 | 0.248 | 0.147 | 0.138 | 0.092 | Acidophilic, autotrophic, Fe- and S-oxidation               | (Hallberg et al., 2010)   |
| <i>Gallionella</i>            | 0.028  | 0.028 | 0.018 | 0.037 | 0.083 | 0.037 | 0.046 | 0.046 | ND    | 0.018 | ND    | Neutrophilic, autotrophic, Fe-oxidation                     | (Hallbeck et al., 1993)   |
| <i>Thermomonas</i>            | 0.028  | 0.064 | 0.101 | 0.092 | 0.073 | 0.119 | 0.119 | 0.028 | 0.046 | 0.138 | 0.046 | Thermophilic, Fe-oxidation                                  | (Alves et al., 2003)      |
| <i>Geothrix</i>               | ND     | 0.037 | 0.037 | 0.055 | 0.147 | 0.037 | 0.073 | 0.018 | 0.055 | ND    | 0.018 | Heterotrophic, Fe-reduction                                 | (Coates et al., 1999)     |
| <i>Aquabacterium</i>          | 0.018  | 0.000 | 0.037 | 0.055 | 0.083 | 0.037 | 0.046 | 0.018 | 0.009 | 0.009 | 0.009 | Heterotrophic, Fe-reduction                                 | (Kalmbach et al., 1999)   |
| <i>Aciditerrimonas</i>        | 3.194  | 1.000 | 0.596 | 0.826 | 0.743 | 0.808 | 0.899 | 0.817 | 1.055 | 0.853 | 0.909 | Heterotrophic, acidophilic, Fe-reduction                    | (Itoh et al., 2011)       |
| <i>Metallibacterium</i>       | 2.670  | 0.954 | 1.248 | 1.120 | 1.046 | 0.826 | 1.138 | 0.863 | 0.964 | 0.863 | 0.789 | Facultatively, acid-tolerant, Fe-reduction                  | (Ziegler et al., 2013)    |
| <i>Shewanella</i>             | 1.285  | 3.873 | 1.358 | 1.193 | 1.019 | 0.936 | 0.918 | 1.009 | 1.074 | 4.469 | 0.826 | Facultatively, halotolerant, Fe-reduction                   | (Lies et al., 2005)       |
| <i>Geobacter</i>              | 0.174  | 0.211 | 0.707 | 0.367 | 0.477 | 1.303 | 0.312 | 0.514 | 0.239 | 0.321 | 0.330 | Anaerobic, Fe-and sulfate reduction                         | (Lovley et al., 1993)     |
| <i>Anaeromyxobacter</i>       | 0.138  | 0.229 | 0.156 | 0.229 | 0.138 | 0.459 | 0.184 | 0.239 | 0.174 | 0.138 | 0.294 | Anaerobic, Fe-reduction                                     | (Sanford et al., 2002)    |
| <i>Acidiphilium</i>           | 0.018  | 0.028 | 0.009 | 0.009 | 0.000 | 0.018 | 0.000 | 0.000 | 0.028 | 0.000 | 0.009 | Acidophilic, heterotrophic, Fe-reduction                    | (Küsel et al., 1999)      |
| <i>Acidocella</i>             | 0.193  | 0.018 | 0.073 | 0.064 | 0.055 | 0.046 | 0.046 | 0.009 | 0.018 | 0.028 | 0.037 | Acidophilic, heterotrophic, Fe-reduction                    | (Johnson et al., 2006)    |
| <i>Desulfomonile</i>          | 0.284  | 0.358 | 0.541 | 0.395 | 0.459 | 0.551 | 0.358 | 1.377 | 1.055 | 0.376 | 1.211 | Anaerobic, dehalogenating, sulfate reduction                | (DeWeerd et al., 1990)    |
| <i>Syntrophobacter</i>        | 0.991  | 0.275 | 0.358 | 0.367 | 0.275 | 0.413 | 0.220 | 0.431 | 0.753 | 0.367 | 0.257 | Anaerobic, syntrophic, sulfate reduction                    | (Boone and Bryant, 1980)  |

**Table S4. (Cont'd)**

|                           |       |       |       |       |       |       |       |       |       |       |       |                                             |                                    |
|---------------------------|-------|-------|-------|-------|-------|-------|-------|-------|-------|-------|-------|---------------------------------------------|------------------------------------|
| <i>Desulfobacca</i>       | 0.037 | 0.110 | 0.257 | 0.092 | 0.101 | 0.211 | 0.110 | 0.395 | 0.257 | 0.138 | 0.073 | Anaerobic, heterotrophic, sulfate reduction | (Elferink et al., 1999)            |
| <i>Desulfobulbus</i>      | 0.046 | 0.028 | 0.073 | 0.037 | 0.092 | 0.211 | 0.055 | 0.046 | 0.018 | 0.055 | 0.028 | Anaerobic, heterotrophic, sulfate reduction | (Widdel and Pfennig, 1982)         |
| <i>Desulfococcus</i>      | 0.037 | 0.119 | 0.028 | 0.083 | 0.083 | 0.073 | 0.064 | 0.110 | 0.037 | 0.037 | 0.028 | Anaerobic, heterotrophic, sulfate reduction | (Imhoff-Stuckle and Pfennig, 1983) |
| <i>Clostridium</i>        | 0.037 | 0.239 | 0.128 | 0.110 | 0.064 | 0.092 | 0.156 | 0.101 | 0.046 | 0.055 | 0.083 | Anaerobic, heterotrophic, sulfate reduction | (Akagi and Campbell, 1962)         |
| <i>Desulfobacterium</i>   | 0.037 | 0.046 | 0.083 | 0.037 | 0.055 | 0.055 | 0.046 | 0.037 | 0.046 | 0.073 | 0.073 | Anaerobic, heterotrophic, sulfate reduction | (Brysch et al., 1987)              |
| <i>Desulfomicrobium</i>   | 0.018 | 0.046 | 0.156 | 0.046 | 0.046 | 0.055 | 0.046 | ND    | ND    | 0.046 | 0.037 | Anaerobic, heterotrophic, sulfate reduction | (Langendijk et al., 2001)          |
| <i>Desulfosporosinus</i>  | 0.395 | 0.018 | 0.046 | 0.046 | 0.028 | 0.037 | 0.046 | 0.028 | 0.101 | 0.028 | 0.055 | Spore-forming, sulfate reduction            | (Robertson et al., 2001)           |
| <i>Desulfitobacterium</i> | 0.220 | 0.018 | 0.037 | 0.018 | 0.028 | 0.028 | 0.018 | 0.028 | 0.073 | 0.046 | 0.028 | Anaerobic, heterotrophic, sulfate reduction | (Gerritse et al., 1996)            |
| <i>Desulfovibrio</i>      | 0.018 | 0.037 | 0.064 | 0.018 | ND    | 0.046 | ND    | 0.018 | 0.018 | ND    | 0.037 | Anaerobic, heterotrophic, sulfate reduction | (Nicolet et al., 1999)             |
| <i>Sulfuritalea</i>       | 0.202 | 0.128 | 0.229 | 0.211 | 0.239 | 0.294 | 0.459 | 0.505 | 0.037 | 0.174 | 0.128 | Facultative, autotrophic, S-oxidation       | (Kojima and Fukui, 2011)           |
| <i>Sulfurimonas</i>       | ND    | 0.092 | 0.138 | ND    | ND    | ND    | 0.018 | 0.046 | ND    | 0.018 | 0.018 | Mesophilic autotrophic, S-oxidation         | (Inagaki et al., 2003)             |
| <i>Sulfuricurvum</i>      | 0.101 | 0.110 | 1.358 | 0.128 | 0.128 | 0.459 | 0.211 | 0.239 | 0.083 | 0.092 | 0.174 | Facultative, autotrophic, S-oxidation       | (Kodama and Watanabe, 2004)        |

**A**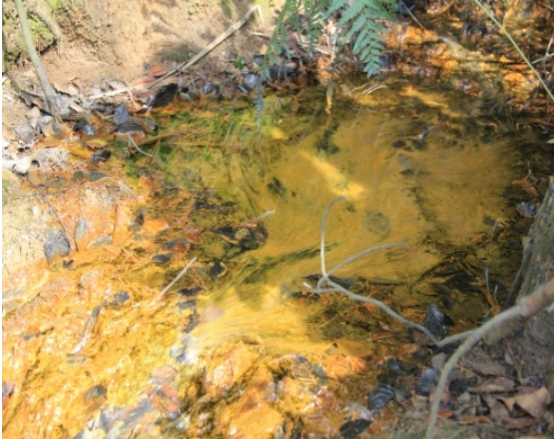**B**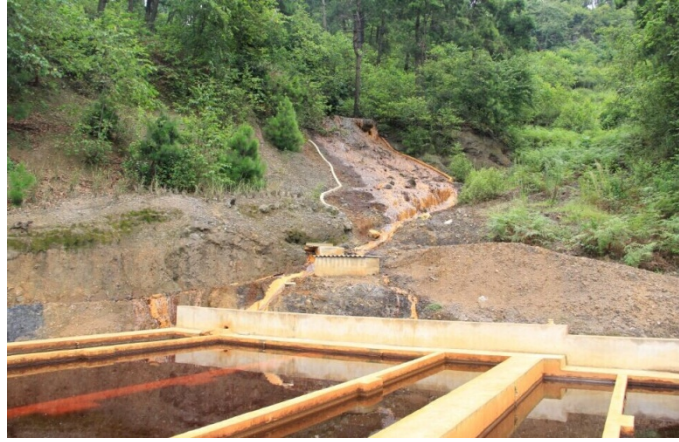**C**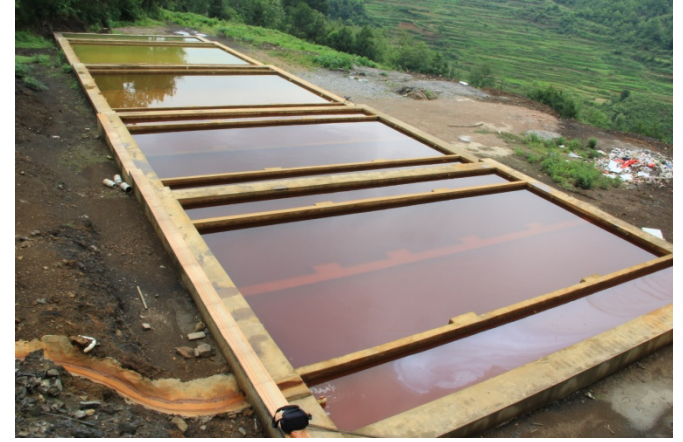

**Figure S1.** Photos showing the major components of zone 1. A: the acid streamer from which B1 was taken; B: the acid mine drainage in zone 1; C: the onsite bioreactor treating AMD in zone 1. The onsite bioreactor will be operational soon.



## Reference:

- Akagi, J., and Campbell, L.L. (1962) Studies on thermophilic sulfate-reducing bacteria III. Adenosine triphosphate-sulfurylase of *Clostridium nigrificans* and *Desulfovibrio desulfuricans*. *Journal of Bacteriology* **84**: 1194-1201.
- Alves, M.P., Rainey, F.A., Nobre, M.F., and da Costa, M.S. (2003) *Thermomonas hydrothermalis* sp. nov., A New Slightly Thermophilic  $\gamma$ -Proteobacterium Isolated from a Hot Spring in Central Portugal. *Systematic and applied microbiology* **26**: 70-75.
- Boone, D.R., and Bryant, M.P. (1980) Propionate-degrading bacterium, *Syntrophobacter wolinii* sp. nov. gen. nov., from methanogenic ecosystems. *Applied and environmental microbiology* **40**: 626-632.
- Brysch, K., Schneider, C., Fuchs, G., and Widdel, F. (1987) Lithoautotrophic growth of sulfate-reducing bacteria, and description of *Desulfobacterium autotrophicum* gen. nov., sp. nov. *Archives of microbiology* **148**: 264-274.
- Coates, J.D., Ellis, D.J., Gaw, C.V., and Lovley, D.R. (1999) *Geothrix fermentans* gen. nov., sp. nov., a novel Fe (III)-reducing bacterium from a hydrocarbon-contaminated aquifer. *International journal of systematic and evolutionary microbiology* **49**: 1615-1622.
- DeWeerd, K.A., Mandelco, L., Tanner, R.S., Woese, C.R., and Suflita, J.M. (1990) *Desulfomonile tiedjei* gen. nov. and sp. nov., a novel anaerobic, dehalogenating, sulfate-reducing bacterium. *Archives of microbiology* **154**: 23-30.
- Elferink, S.J.O., Akkermans-van Vliet, W., Bogte, J.J., and Stams, A.J. (1999) *Desulfobacca acetoxidans* gen. nov., sp. nov., a novel acetate-degrading sulfate reducer isolated from sulfidogenic granular sludge. *International journal of systematic bacteriology* **49**: 345-350.
- Gerritse, J., Renard, V., Gomes, T.P., Lawson, P.A., Collins, M.D., and Gottschal, J.C. (1996) *Desulfitobacterium* sp. strain PCE1, an anaerobic bacterium that can grow by reductive dechlorination of tetrachloroethene or ortho-chlorinated phenols. *Archives of microbiology* **165**: 132-140.
- Hallbeck, L., Ståhl, F., and Pedersen, K. (1993) phylogeny and phenotypic characterization of the stalk-forming and iron-oxidizing bacterium *Gallionella ferruginea*. *Journal of general microbiology* **139**: 1531-1535.
- Hallberg, K.B., González-Toril, E., and Johnson, D.B. (2010) *Acidithiobacillus ferrivorans*, sp. nov.; facultatively anaerobic, psychrotolerant iron-, and sulfur-oxidizing acidophiles isolated from metal mine-impacted environments. *Extremophiles* **14**: 9-19.
- Imhoff-Stuckle, D., and Pfennig, N. (1983) Isolation and characterization of a nicotinic acid-degrading sulfate-reducing bacterium, *Desulfococcus niacini* sp. nov. *Archives of microbiology* **136**: 194-198.
- Inagaki, F., Takai, K., Kobayashi, H., Nealson, K.H., and Horikoshi, K. (2003) *Sulfurimonas autotrophica* gen. nov., sp. nov., a novel sulfur-oxidizing  $\epsilon$ -proteobacterium isolated from hydrothermal sediments in the Mid-Okinawa Trough. *International journal of systematic and evolutionary microbiology* **53**: 1801-1805.
- Itoh, T., Yamanoi, K., Kudo, T., Ohkuma, M., and Takashina, T. (2011) *Aciditerrimonas ferrireducens* gen. nov., sp. nov., an iron-reducing thermoacidophilic actinobacterium isolated from a solfataric field. *International journal of systematic and evolutionary microbiology* **61**: 1281-1285.
- Jiang, C.-Y., Liu, Y., Liu, Y.-Y., You, X.-Y., Guo, X., and Liu, S.-J. (2008) *Alicyclobacillus ferrooxydans* sp. nov., a ferrous-oxidizing bacterium from solfataric soil. *International journal of systematic and evolutionary microbiology* **58**: 2898-2903.
- Johnson, D.B., Hallberg, K.B., and Hedrich, S. (2014) Uncovering a Microbial Enigma: Isolation and Characterization of the Streamer-Generating, Iron-Oxidizing, Acidophilic Bacterium “*Ferrovum myxofaciens*”. *Applied and environmental microbiology* **80**: 672-680.
- Johnson, D.B., Stallwood, B., Kimura, S., and Hallberg, K.B. (2006) Isolation and characterization of *Acidicaldus organivorus*, gen. nov., sp. nov.: a novel sulfur-oxidizing, ferric iron-reducing thermo-acidophilic heterotrophic Proteobacterium. *Archives of microbiology* **185**: 212-221.
- Kalmbach, S., Manz, W., Wecke, J., and Szewzyk, U. (1999) *Aquabacterium* gen. nov., with description of *Aquabacterium citratiphilum* sp. nov., *Aquabacterium parvum* sp. nov. and *Aquabacterium commune* sp. nov., three in situ dominant bacterial species from the Berlin drinking water system. *International journal of systematic bacteriology* **49**: 769-777.
- Kodama, Y., and Watanabe, K. (2004) *Sulfuricurvum kujiense* gen. nov., sp. nov., a facultatively anaerobic, chemolithoautotrophic, sulfur-oxidizing bacterium isolated from an underground crude-oil storage cavity. *International journal of systematic and evolutionary microbiology* **54**: 2297-2300.
- Kojima, H., and Fukui, M. (2011) *Sulfuritalea hydrogenivorans* gen. nov., sp. nov., a facultative autotroph isolated from a freshwater lake. *International journal of systematic and evolutionary microbiology* **61**: 1651-1655.
- Küsel, K., Dorsch, T., Acker, G., and Stackebrandt, E. (1999) Microbial reduction of Fe (III) in acidic sediments: isolation of *Acidiphilium cryptum* JF-5 capable of coupling the reduction of Fe (III) to the oxidation of glucose.

*Applied and environmental microbiology* **65**: 3633-3640.

Langendijk, P., Kulik, E., Sandmeier, H., Meyer, J., and Van der Hoeven, J. (2001) Isolation of *Desulfomicrobium orale* sp. nov. and *Desulfovibrio* strain NY682, oral sulfate-reducing bacteria involved in human periodontal disease. *International journal of systematic and evolutionary microbiology* **51**: 1035-1044.

Lies, D.P., Hernandez, M.E., Kappler, A., Mielke, R.E., Galnick, J.A., and Newman, D.K. (2005) *Shewanella oneidensis* MR-1 uses overlapping pathways for iron reduction at a distance and by direct contact under conditions relevant for biofilms. *Applied and environmental microbiology* **71**: 4414-4426.

Lovley, D.R., Giovannoni, S.J., White, D.C., Champine, J.E., Phillips, E., Gorby, Y.A., and Goodwin, S. (1993) *Geobacter metallireducens* gen. nov. sp. nov., a microorganism capable of coupling the complete oxidation of organic compounds to the reduction of iron and other metals. *Archives of microbiology* **159**: 336-344.

Nicolet, Y., Piras, C., Legrand, P., Hatchikian, C.E., and Fontecilla-Camps, J.C. (1999) *Desulfovibrio desulfuricans* iron hydrogenase: the structure shows unusual coordination to an active site Fe binuclear center. *Structure* **7**: 13-23.

Robertson, W., Bowman, J., Franzmann, P., and Mee, B. (2001) *Desulfosporosinus meridiei* sp. nov., a spore-forming sulfate-reducing bacterium isolated from gasoline-contaminated groundwater. *International journal of systematic and evolutionary microbiology* **51**: 133-140.

Sanford, R.A., Cole, J.R., and Tiedje, J.M. (2002) Characterization and description of *Anaeromyxobacter dehalogenans* gen. nov., sp. nov., an aryl-halorespiring facultative anaerobic myxobacterium. *Applied and environmental microbiology* **68**: 893-900.

Temple, K.L., and Colmer, A.R. (1951) The autotrophic oxidation of iron by a new bacterium: *Thiobacillus ferrooxidans*. *Journal of Bacteriology* **62**: 605.

Widdel, F., and Pfennig, N. (1982) Studies on dissimilatory sulfate-reducing bacteria that decompose fatty acids II. Incomplete oxidation of propionate by *Desulfobulbus propionicus* gen. nov., sp. nov. *Archives of microbiology* **131**: 360-365.

Ziegler, S., Waidner, B., Itoh, T., Schumann, P., Spring, S., and Gescher, J. (2013) *Metallibacterium scheffleri* gen. nov., sp. nov., an alkalizing gammaproteobacterium isolated from an acidic biofilm. *International journal of systematic and evolutionary microbiology* **63**: 1499-1504.
